# Supplementary material for: Novel Expressed Sequence Tag-Derived and Other Genomic Simple Sequence Repeat Markers Revealed Genetic Diversity in Ethiopian Finger Millet Landrace Populations and Cultivars
Source: Front Plant Sci. 2021 Sep 23;12:735610. doi: 10.3389/fpls.2021.735610 (PMC8495221; doi:10.3389/fpls.2021.735610)
Supplement: Supplementary file 2 [file Table_2.xlsx]

## Sheet: New EST-SSRs
Table S2: List of the 13 EST-SSRs developed in the present study including their repeat motifs, and the start and end positions of the loci, the position of the repeat motifs in the corresponding EST sequences
Column G shows whether the SSR repeat motif is located in a 5'untralslated region (5'UTR), coding sequence (CDS) or 3'untralslated region (3'UTR) within their corrsponding gene.
?? = There was no enough information from comparative geentics analysis to determine whether a repeat motif is located in 5'UTR, 3'UTR or CDS.
* = the locus is monomorphic accross the 60 accessions studied
** = the locus is polymorphic
Locus name	SSR repeat motif	SSR position	Start	end	PCR Product size	Location of the SSR in the gene	Forward primer sequence (5'-3')	Reverse primer sequence (5'-3')	Anealing temprature	EST sequence
Elco-14*	(CGC)6	272-289	49	349	301	??	GAGTAGCAGACCAAACCCTCAC	CCAACGATCTAGGAGCCGT	58	>CX265196.1 CFM05-0634 Finger millet developing seed cDNA Eleusine coracana cDNA clone CFM05-0634 5' similar to Best blastX hit, e-value: 1.00E-08, acc.no: BAB44000, ID: P0434B04.21, mRNA sequence
										AGCGGATCGCGCCGACGNCCACCTTCCCTCCCTTGCGCCGTCGAGAGAGAGTAGCAGACCAAACCCTCACCCCCGCGCTTTCCCCTTCCCTCGAGNGAGACGAAGATGGCGCCCAAGAGGAAGAAGAGCCATGGCGACGGCAACAAGGACGCCGACTCCGCAACAAATCAGAACGGCGGATCGACGACGACACCCGACTTCGCCAAGCCGGTTTACCTCGTGGNGGAGCACGAGGGGTCGAGAAGACGGACTACTCCGTCTTCAAGCTCGACGCCGCCGCCGCCGCCGCTTCCGCGNGCGGGATGTCCTTCGTCACCGCGCACTCGACGCACGGCTCCTAGATCGTTGGCGTCAGGGGCGAGCACCGAGCGGGGACCATCATCTTCGACCCGACCACGC…
Elco-27**	(GA)7	52-65	27	177	150	5'UTR	TCCTGTGAGTGAGTGATTAGCG	GAAGATGAGGGTGGAGATGAAC	59	>CX264718.1 FMB00-0052 Finger millet developing seed cDNA Eleusine coracana cDNA clone FMB00-0052 5' similar to Best blastX hit, e-value: 2.00E-76, acc.no: P50156, ID: TONOPLAST INTRINSIC PROTEIN, GAMMA (GAMMA TIP) (AQUAPORIN-TIP), mRNA sequence
										TCATCCCTGAGCTGAGCAGCACACTCTCCTGTGAGTGAGTGATTAGCGTGGGAGAGAGAGAGAGAAAGGCAGCTCAAGATGCCGATCCGTAACATCGCCGTGGGCAACACCCAGGAGGTGTACCACCCGGGTGCCCTCAAGGCGGCGCTCGCTGAGTTCATCTCCACCCTCATCTTCGTCTTCGCCGGCCAGGGCTCCGGCATGGCCTTCAGCAAGCTGAGCGGCGGCGGTTCCAGCCCTGCCGGCCTGATCTCCGCCGCGATCGCCCACGCCTTCGCCCTGTTCGTCGCCGTCTCCGTCGGCGCCAACATCTCCGGCGGTCACGTGAACCCTGCCGTTACCTTCGGCGCCTTCCTTGGCGGCAACATCACCCTGTTCCGCGGCATCCTGTACTGGATC…
Elco-33**	(GAG)7	345-365	238	394	158	CDS	TCGTAGAGAACTACCTCCGCTC	TCGTACTCCCTCTTCTTCTTGC	58	>CX264824.1 FMB01-0175 Finger millet developing seed cDNA Eleusine coracana cDNA clone FMB01-0175 5' similar to Best blastX hit, e-value: 9.00E-43, acc.no: BAB44036, ID: P0684B02.23, mRNA sequence
										GTAGAGGACTAGGAGCCTAGGACGAACTCCGGCGAAGAAAGCCGAAGCGTCGGCGGCGGCGGCGGCAAGGCTCCGGCATGGACGAGCAGACGAAAAAGAAGGTAGAGGCGACGGTGCTGGAGATCCTTCGGGGTGCGGACATGGAGTCCGTCACGGAGTACAAAGTCCGCTCCGCGGCTGCCGACCGCCTCGGCATCGATCTCTCAGTCCCCGACCGCAAGCTATTCGTCCGAGGCGTCGTAGAGAACTACCTCCGCTCCCTCCCCTCTGAGGAGGAAGAGCAGCAACAGGACGGCGCCGGCGAGGAGGGGAAGGACAAACAGGAGGAGGAAGAAGAAGAAGATGAGGAGGAGGAGGAGGAGGAGGGGGATGGCAAGAAGAAGAGGGAGTACGACGACC…
Elco-35*	(GC)6	159-170	51	321	271	??	GTAAAGTAGGAAGCAGCGATGG	ACCGTACACATACGCATCTCAT	58	>CX265150.1 CFM04-0575 Finger millet developing seed cDNA Eleusine coracana cDNA clone CFM04-0575 5' similar to Best blastX hit, e-value: 0.63, acc.no: NP_178420, ID: xyloglucan fucosyltransferase, putative; protein id: At2g03210.1, mRNA sequence
										ATAATGAGCTGGTTGCTGCTACCACCACGCGCTCCGCTCGTCCATCTCAAGTAAAGTAGGAAGCAGCGATGGTGGCGTCCCTTCTAGACTCAGTTTGTGCTTTGTACGATGTTCGTTGAGCTGTTCCGAGACCAGTGGAATAAGTAGCGTGCTAGCTAGCGCGCGCGCGCGAGCCATGTAGAATTGTATATGTAGCAAGGAGGGTTGTGTTCTGTCTCCGCGCGCGATGTATATGTATGTATGCGCGCATGTGTGGACTGCACGTATGTGAACTTTCCTGGTAAAATAATGCTGCTGAGATGAGATGCGTATGTGTACGGTACGCACTCAGCTTTCTAAAAAAAAAAAAAAAAAAAAAAAAAAAAAAAAAAAAAAAAAAAAAAAAAAAA
Elco-37**	(GCG)6	329-346	269	580	311	CDS	ATGGAGGATCTCATGTTCGC	GCACCATGTTTTGTTTATGCAC	59	>CX265154.1 CFM04-0579 Finger millet developing seed cDNA Eleusine coracana cDNA clone CFM04-0579 5' similar to Best blastX hit, e-value: 3.00E-13, acc.no: BAB55496, ID: P0638D12.4, mRNA sequence
										TTTNGGCACGTTCGAGCTGTGGCTCCACCCGTCGCGGTACCGCACCCGCCCCTGCCGCGCGGGCGTCTTNTGCCGCCGCCGCGTCTGCTTCTTCGCGCACACCGCCGCCGAGCTCCGCGCGGCGCCCATTAAGGAGGAGCACGCGCCGATGTCGGTGTCGCCCAAGTCGACTTTGGCCTCGCTCATGTGGGAGTCGCCGCCCGTGTCGCCTGTGCAGGGGCAGCAGCGGAGCTGGATCGACGCGGTCGATGAGGTGGATGATGCCNAGATGGAGGATCTCATGTTCGCAATGCGGGAGCTCAGCTTGAGGAAGCAGGTTGCTGCTGCTGCGGCGGCGGCGGCGGCGCCGGTGCTGCCGCTCGTCACGGAGGAGGACGGGCCGGACCTCGGGTGGGTGTC…
Elco-39**	(GCG)7	232-252	112	294	182	CDS	GACCAGCGCGAGAACTACAT	CCTGCCCCTGTGTGACTACTAC	59	>CX265194.1 CFM05-0632 Finger millet developing seed cDNA Eleusine coracana cDNA clone CFM05-0632 5' similar to Best blastX hit, e-value: 5.00E-12, acc.no: BAC55745, ID: P0456B03.7, mRNA sequence
										ACTCCATCTCCTTCCCTCGCTTTCCCCATCCTTGGAACAACCGGCGGGCCTAACCCCAACGTCGTCGTCGGCGCCATCGTCGGCGGGNCAGACCGGNGCGACAGGTTCCGCGACCAGCGCGAGAACTACATGCAGACGGAGGCATGCACGTACAACACCGCGCCCATGGTCGGAATGTTCGCCATGCTCAACAGGCTGGCCCGGGACGAGCAGGCGGCGGCTACTACACCTGCGGCGGCGGCGGCGGCGGCGGACCAAAGTGTAAATAGGTAGTAGTAGTCACACAGGGGCAGGGGGGCTGTACAATTTTTCCTACCCCGATTCTTTTGTTCATTCTTTTCTACATACTCCTAGGTGTGATGAAGTGAAGGNACTCTTCACACACACACACAAAGATTA…
Elco-40**	(GCG)7	251-271	143	308	166	5'UTR	TAGTGGGTTCCATCCCTATTTG	CCGACCTAAACATCAAGAAACG	58	>CX264962.1 CFM02-0351 Finger millet developing seed cDNA Eleusine coracana cDNA clone CFM02-0351 5' similar to Best blastX hit, e-value: 1.8, acc.no: NP_647859, ID: CG14992-PA, mRNA sequence
										TTCTCACTCCTCTTTTCCTCAGGTGTGTGTGGGGAGCACACACACAATCCGTTTTCTCTCCCCCGGTTTCTCTTGTCCCGTTGCGGCCATGGACCAAGAAACCTCACGGGAACCCCACCTCAGGAGCCCTCCGGTGCTGCATTAGTGGGTTCCATCCCTATTTGGATCGCCTCTCGCGATCGCATTGCCTCTGTTTCTTGATTTTGTCCATCTCGTCAGTTCTTAGATTCTTCGAGGAAGGAGGGATTCAGCGGCGGCGGCGGCGGCGGCGCCAGNTTACTGGTCGCGTTTCTTGATGTTTAGGTCGGAGTAGAGATTCCCGTTCGAGGAGGGAAAATGGTGGGCGGCGGCGGAGAGCAGCTCGTGATCGACCCAGATGCGGTGGACCTCGAACGCGGC…
Elco-41*	GGA	228-245	104	458	355	CDS	CACAATGACAACCACAACAACA	AGCCACAGGAACAGGAAGAAG	59	>CX265206.1 CFM05-0645 Finger millet developing seed cDNA Eleusine coracana cDNA clone CFM05-0645 5' similar to Best blastX hit, e-value: 7.00E-15, acc.no: AAK43994, ID: unknown protein, mRNA sequence
										CGAGCTCCCTTGATNAGTTCGNCTTCCGTGCGCGTTCCCCACGCACGACCCACGAGAGCTCCTAGCAGCCCACCCCCACCAAGGAGAGAGACATGGCGACCACCACAATGACAACCACAACAACAACAACGGNGGTGANGGNGNTCATCGNCACACTGGAGCCTATCCACGCCGGGCGGTGCTGCGGCCACGGCCGCACCTGCGCGGACGTCGTGGCTATCTGNGCGGGAGGAGGAGGAGGAGGAGCCGGTGGCGTCGGCGACGGAGAAGGAGGNGGCGCTGCCGCGGCTGNTGACGTTCGACGACCTGCCGGATTACCTGCGTGACAACGAGNTCATCCATGGCCACTACCGCTGNNAGTGGTCCGTCCGCGACGCGCTGCGCAGCGTCTTCNCCTGG…
Elco-42**	(GT)7	569-580	375	622	247	3'UTR	GGCACCAACTACTTCATCTGC	ACATGAGCCTGTATCCGTTTG	58	>CX264741.1 FMB00-0077 Finger millet developing seed cDNA Eleusine coracana cDNA clone FMB00-0077 5' similar to Best blastX hit, e-value: 2.00E-25, acc.no: AAM60981, ID: putative basic blue protein plantacyanin, mRNA sequence
										AAGCAGCAGCACACTCACTCCTCTGCTCCCTCTCCACCTCGCACACCAACTCCAGAAACAGGGCAGAAGCGATCGCCATGGCCCAGGGAAGAGGCAGTGCGACGCGGGGACTCGCCTTCGTCGGCGGCTTGCTTGCCGTGTGCCTCCTCCTCGGCGCCGCCGACATCGCCGCCGCGGCCACCCACAACGTCGACTGGACGTTCAGCGCCGACAGCTGGTCCCAGGGCAAGAACTTCCGCGCCGGCGACGTGCTCGTGTTCAACTACAACCCCGCCCTGCACAACGTGGTGGCGGTGGACGCCGGCGGCTACTACGGGTGCCGGCCCTCTGGCACGGCGTACAGCTCCGGGAACGACCGCATCACGCTCGGCCCCGGCACCAACTACTTCATCTGCAGCC…
Elco-43*	(GT)9	723-736	688	813	125	3'UTR	GTTTTCTATGTCCAGGTGTTGG	CATCATCATAAGCATCACATCC	57	>CX264911.1 CFM01-0282 Finger millet developing seed cDNA Eleusine coracana cDNA clone CFM01-0282 5' similar to Best blastX hit, e-value: 2.00E-43, acc.no: A29788, ID: lipid body-associated major protein L3, mRNA sequence
										GCAGCAGTGCACGTGGTGGTAGCTTAGCGCATCCAGCAAGGNCACCATGGCCGATCAGCACCGCGGCACGATGGGAGGAGGCGGCGTCATGGGCGTCCACGGCGGCGGCGGCGAGGGGCAGCAGCAGCAGAGGCAGCCGGCGATGGTGACGGCGCTGAAGGCGGCGACGGCGGCGACGGCCGGCGGGTCGATGCTGGTGCTGTCGGGCCTGATCCTGGCCGGCACGGTGATCGCGCTGACGGTGGCGACGCCCGTGCTGGTCATCTTCAGCCCGGTGCTGGTGCCCGCCGCCATCGCGCTGGCGCTCATGGCCGCCGGGTTCATCACGTCGGGCGGGCTGGGCGTGGCGGCGCTCTCCGTGTTCTCGTGGATGTACAAGTACCTCACGGGCAAGCACCC…
Elco-45*	(TC)15	394-411	252	458	207	??	CATCTCCAATTCTCCATCATCA	ACACACACTGACTGACAAACCC	58	>DY684855.1 LFM232 Finger millet pTriplEx2 library 2 Eleusine coracana subsp. africana cDNA 5', mRNA sequence
										CGAGGCGCTGCTCCGCCTGCCGTCCTTCCTCATCAAGCCGCAGCACAAGTACACCGTCAGGGTGGGCCACACCTGCAAGTTCACCTACAGGTGCGGTGGCGTCTGATGATCCAACTATTAGCTACCTGATCAAATTAAAGCCCGGCCGGTGCCATGCATCATGGTTCATTGCATGGGATGAAGAACTACGTAGAGGCGGCTTCTGCTTCTTGCGTTGTGTTGTGGTTACAGTTCTGCAGTACGTGTCGTCGCATCTCCAATTCTCCATCATCAGTCATGTTTCTGTTTACCATCAGGTATGTGAAAAAAGAAATTAAAAGATAGTTTGGTGTGTGTTATAGGCTTCAGGTAGATATATACGTATTTGTAAGAGTTATATATGTAAGTGCGTACGTGTGT…
Elco-47*	(TC)6	169-198	5	381	377	??	ACTCTAGTTTCCGCTTTCTCCC	CGGCGAGATGGTTAATGTAGAC	58	>EB086245.1 RTM469 Finger millet pTriplEx2 library 3 Eleusine coracana subsp. africana cDNA 5', mRNA sequence
										GGGGACTCTAGTTTCCGCTTTCTCCCTCCCTGCCCACTCGACCGAGCAGCCATTGTCGTCCGAGGCAAGCTCTTGCGCCACCGTCGCCTCTGCCCTTCCCCGCGGTGAATCGAGAGCCAGGGGGTACGCACAACCCCCACCCCCCCTGCAATCACCCCGGCCTCCCATTCTCTCTCTCTCTCTCTCTCTCTCTCTCTCGTGCATCGACGTGTGGATTTGGAGCTTCTTCCCCAAACCCGGCTACCGGACCCCGAGCCACCTAATCGTCGATTCCTCCCCGTCGGTGAGCTATCTTCTCGATTCCTTGGGCTGACACCTAGCTAGGATCATTGCACAACTATTTTGCTCGTCTCGAGACTGTCTACATTAACCATCTCGCCGGAAATCGGCTTCCTGTTG…
Elco-48**	(TC)9	274-285	229	393	165	3'UTR	GAAGCTCTCCTTCCCTCGTC	CGAAAGTAACAACACTCGTTTGC	59	>EB086246.1 RTM472 Finger millet pTriplEx2 library 3 Eleusine coracana subsp. africana cDNA 5', mRNA sequence
										GGGGGGCTGCAACCGCAGGACAGGNCGTTCGAGCTCTCGGCGTTCTACTTCCCCAACATGGCCGAGATGTGGGGGGCCGCCGCCGCCGGCGATCACGCTCATGCCAAGCCGCAAGGGCTCTGCAACACCTTGATGTAGCTATAGGAGAGGGAAAACATGTTCATCATCATGGATTCTTGCGCGCCAGAGAAAGAGAATGATTGCTCATTTGCTACATTGAAATTTCTGGAAGCTCTCCTTCCCTCGTCGCTAGCATAGTTCTTTCTCTTCTCTTCTCTCTCTCTCTTTTTTTTTGACTCGTGTGAATACAGCCTTGTATAGTTGGTGTTTAATTTTGTCGTGTATTACATGTACGAATTATCAGTCTTGTGCAAACGAGTGTTGTTACTTTCGA

## Sheet: SSRs from Dida et al. 2007
List of the three SSRs selected from those Published in Dida 2007, and used in the present study, including repeat motif, product size and sequences of forward and reverse primers
Primer name	Repeat motif	Product size	Forward primer sequence (5'-3')	Reverse primer sequence (5'-3')
UGEP27F	(GA)19	247	TTGCTCTGAGGTTGTGTTGC	TCAAGCATAGTGCCCTCCTC
UGEP66F	(AG)29	219	CAGATCTGGGTAGGGCTGTC	GATGGTGGTTCATGCCAAC
UGEP24F	(GA)26	183	GCCTTTTGATTGTTCAACTCG	CGTGATCCCTCTCCTCTCTG
